# Hematocrit, Independent of Chronic Kidney Disease, Predicts Adverse Cardiovascular Outcomes in Chinese Patients With Type 2 Diabetes

PETER C.Y. TONG, PHD<sup>1</sup>  
 ALICE P.S. KONG, MBCHB<sup>1,2</sup>  
 WING-YEE SO, MBCHB<sup>1</sup>  
 MARGARET H.L. NG, MD<sup>3</sup>  
 XILIN YANG, PHD<sup>1</sup>  
 MAGGIE C.Y. NG, PHD<sup>1</sup>

RONALD C.W. MA, MA<sup>1</sup>  
 CHUNG-SHUN HO, PHD<sup>4</sup>  
 CHRISTOPHER W.K. LAM, PHD<sup>4</sup>  
 CHUN-CHUNG CHOW, MBCHB<sup>1</sup>  
 CLIVE S. COCKRAM, MD<sup>1</sup>  
 JULIANA C.N. CHAN, MD<sup>1</sup>

**OBJECTIVE** — Anemia and chronic kidney disease (CKD) are risk factors for cardiovascular diseases in diabetes. We examined the association between hematocrit, stratified by the presence of CKD, and cardiovascular events in a cohort of Chinese subjects with type 2 diabetes.

**RESEARCH DESIGN AND METHODS** — A total of 3,983 patients who underwent assessment for diabetes complications were recruited. Subjects were categorized into five groups. Group I included subjects with hematocrit below the normal sex-specific range. The cutoff points for groups II–V were selected to represent the distribution of the hematocrit for each sex. CKD was defined by the estimated glomerular filtration rate  $<60$  ml/min per  $1.73$  m<sup>2</sup>. Cardiovascular events were defined as cardiovascular mortality and morbidity, including new onset of myocardial infarction, acute coronary syndrome, revascularization, heart failure, and stroke requiring hospitalization.

**RESULTS** — A total of 294 subjects (7.4%) developed cardiovascular events during the median of 36.4 months. The rate of cardiovascular events was highest in subjects with low hematocrit (group I, 18.6%) compared with group V (3.4%,  $P < 0.001$ ). The multivariate-adjusted hazard ratio for cardiovascular events diminished with increasing hematocrit (group I, 1.0; group II, 0.73 [95% CI 0.51–1.04]; group III, 0.57 [0.39–0.83]; group IV, 0.61 [0.39–0.95]; and group V, 0.36 [0.17–0.79]). After stratifying by the presence of CKD, the previously observed reduction in the risk of developing cardiovascular events with increasing hematocrit was abolished in the cohort with CKD but persisted in the non-CKD cohort.

**CONCLUSIONS** — In Chinese subjects with type 2 diabetes, low levels of hematocrit and the presence of CKD are associated with increased risk of developing adverse cardiovascular events.

*Diabetes Care* 29:2439–2444, 2006

Diabetes is a leading cause of end-stage renal disease and cardiovascular diseases, with 60% of the global diabetic population coming from Asia (1). Approximately 26 million people are estimated to have diabetes in China (2). Growing evidence confirms the predictive role of chronic kidney disease (CKD) on cardiovascular morbidity and mortality (3,4). This is due to the constellation of conventional and nonconventional risk factors in patients who develop CKD, such as anemia, inflammation, and abnormal bone metabolism (5,6). In this regard, hematocrit is a risk factor for cardiovascular disease and all-cause mortality in patients with CKD (7), patients with left ventricular dysfunction (8), and the general population (9).

Despite the close associations between CKD and diabetes, there is a paucity of information on the relationship between levels of hematocrit, CKD, and clinical outcomes in patients with type 2 diabetes. In the present study, we examined the association between hematocrit, stratified by the presence of CKD, and the development of cardiovascular events in a cohort of Chinese type 2 diabetic subjects.

## RESEARCH DESIGN AND METHODS

Patients with diabetes were referred from general practitioners, general medical clinics, and other specialist clinics of the hospital to the Diabetes Centre, Prince of Wales Hospital and underwent comprehensive assessment of complications and risk factors based on the European DiabCare protocol (10). Between 1995 and 2000, 4,231 patients underwent assessments with measurement of hematocrit. Patients with type 1 diabetes ( $n = 248$ ), defined as acute presentation with diabetic ketoacidosis, heavy ketouria ( $>3+$ ), or continuous requirement of insulin within 1 year of diagnosis, were excluded from this analysis. A total of 3,983 subjects were included in the final analysis. Informed consent was obtained from all patients at the time of assessment to allow use of data for re-

From the <sup>1</sup>Department of Medicine and Therapeutics, The Chinese University of Hong Kong, Prince of Wales Hospital, Shatin, Hong Kong; the <sup>2</sup>Li Ka Shing Institute of Health Sciences, The Chinese University of Hong Kong, Prince of Wales Hospital, Shatin, Hong Kong; the <sup>3</sup>Department of Anatomical and Cellular Biology, The Chinese University of Hong Kong, Prince of Wales Hospital, Shatin, Hong Kong; and the <sup>4</sup>Department of Chemical Pathology, The Chinese University of Hong Kong, Prince of Wales Hospital, Shatin, Hong Kong.

Address correspondence and reprint requests to Dr. Peter C.Y. Tong, Department of Medicine and Therapeutics, The Chinese University of Hong Kong, Prince of Wales Hospital, Shatin, NT, Hong Kong. E-mail: ptong@cuhk.edu.hk.

Received for publication 29 April 2006 and accepted in revised form 28 July 2006.

**Abbreviations:** AER, albumin excretion rate; ARB, angiotensin II receptor blocker; CKD, chronic kidney disease; eGFR, estimated glomerular filtration rate.

A table elsewhere in this issue shows conventional and Système International (SI) units and conversion factors for many substances.

DOI: 10.2337/dc06-0887

© 2006 by the American Diabetes Association.

The costs of publication of this article were defrayed in part by the payment of page charges. This article must therefore be hereby marked "advertisement" in accordance with 18 U.S.C. Section 1734 solely to indicate this fact.

search purpose. The study was approved by the Chinese University of Hong Kong Clinical Research Ethics Committee.

Details of the assessment and laboratory measurement of metabolic parameters were described previously (11). Fasting plasma glucose, lipids (including total cholesterol, HDL cholesterol, triglyceride, and calculated LDL cholesterol), renal and liver functions, complete blood count, and HbA<sub>1c</sub> (A1C) were measured. A timed urinary collection (4 or 24 h) was obtained to document albumin excretion rate (AER) after exclusion of urinary tract infection. Nonalbuminuria was defined as urinary AER <20 µg/min. Albuminuria was defined as AER ≥20 µg/min. Estimated glomerular filtration rate (eGFR; expressed in milliliters per minute per 1.73 m<sup>2</sup>) was calculated using the abbreviated Modification of Diet in Renal Disease Study Group formula (12).

$GFR = 186 \times [S_{CR} \times 0.011]^{-1.154} \times [age]^{-0.203} \times [0.742 \text{ if female}]$ , where  $S_{CR}$  is serum creatinine expressed as micromoles per liter. CKD was defined as eGFR <60 ml/min per 1.73 m<sup>2</sup> (13). In Hong Kong Chinese, the reference ranges of hematocrit for male and female individuals were ≥39 to <50 and ≥32 to <43%, respectively.

Given the bell-shaped distribution of hematocrit in the cohort, the approach of dividing the cohort into quintiles was not appropriate. It would include subjects with very different hematocrit within the same category of the quintiles. Hence, subjects were categorized into the following five groups on the basis of the sex-specific hematocrit value: group I, male <39%, female <32%; group II, male ≥39 to <43%, female ≥32 to <36%; group III, male ≥43 to <47%, female ≥36 to <40%; group IV, male ≥47 to <50%, female ≥40 to <43%; and group V, male ≥50%, female ≥43%.

Group I included subjects with hematocrit below the normal sex-specific range. The cutoff points for groups II–V were selected to represent the distribution of the hematocrit for each sex in this cohort of subjects.

On 31 December 2000, all registered patients were censored using mortality data from the Hong Kong Death Registry. Details of all medical admissions with primary and secondary diagnosis using the ICD-9 codes and last available serum creatinine results within 12 months of the date of the censor were retrieved from the Hospital Authority Central Computer System. All causes of death were further

ascertained by review of case notes by an endocrinologist. Cardiovascular events were defined as cardiovascular mortality and morbidity, including new onset of myocardial infarction, acute coronary syndrome, revascularization (coronary arterial bypass grafting, percutaneous transluminal coronary angioplasty, and aorto-femoral bypass), heart failure, and stroke requiring hospitalization.

### Statistical analysis

The analysis was performed using the SPSS (version 11.5) package. Triglyceride, white blood cell count, creatinine, eGFR, and albuminuria were logarithmically transformed due to skewed distributions. All data are expressed as means ± SD or median (interquartile range), as appropriate. Student's *t* test or ANOVA was used for between-group comparisons for continuous variables and  $\chi^2$  test for categorical variables. Cox multivariate regression analysis was used to examine association between CKD and hematocrit for cardiovascular events expressed as hazard ratios (HRs) and 95% CIs. Independent variables included in the model were age, sex, duration of diabetes, smoking history (current and former), BMI, mean arterial pressure, A1C, white blood cell count, HDL cholesterol, LDL cholesterol, triglyceride, and prevalent macrovascular disease. The incidence of cardiovascular events was analyzed using Kaplan-Meier analyses according to different categories of hematocrit. A *P* value <0.05 (two tailed) was considered significant.

**RESULTS** — In this study, 3,983 subjects with type 2 diabetes (mean [±SD] age 59.1 ± 13.5 years, 43.8% male) were followed for a median of 36.4 months (interquartile range 19.1–50.5). The distributions of hematocrit were lower in women than men (38.6 ± 3.8 vs. 43.3 ± 4.3%, *P* < 0.001). Table 1 compares the clinical characteristics and metabolic parameters of patients according to the five groups of hematocrit. A higher hematocrit was associated with younger age, female preponderance, a shorter duration of diabetes, lower systolic blood pressure, and lower AER. In contrast, subjects with hematocrit below the normal range (group I) had lower BMI, triglyceride, LDL cholesterol, and eGFR compared with individuals with higher hematocrit. Furthermore, lower hematocrit was associated with higher frequencies of smoking, vascular complications, and the use

of ACE inhibitors or angiotensin II receptor blockers (ARBs) at baseline.

During the study period, 294 subjects (7.4%) developed cardiovascular events. The rate was highest in group I (18.6%) and decreased progressively with increasing value of hematocrit (group II 9.6%, group III 5.6%, group IV 5.2%, and group V 3.4%,  $\chi^2 = 93.3$ , *P* < 0.001).

The group of subjects with hematocrit less than the sex-specific normal range for Hong Kong Chinese (group I) was used as the reference group in the analysis of the association between hematocrit and cardiovascular events. After adjustment for age and other confounding factors, there was a reduction in HRs for cardiovascular events in subjects of group III (0.57 [95% CI 0.39–0.83], *P* = 0.03), group IV (0.61 [0.39–0.95], *P* = 0.029), and group V (0.36 [0.17–0.79], *P* = 0.01) compared with group I (Fig. 1). The cumulative event-free probability of cardiovascular outcomes is shown in Fig. 2. The curves separate and continue to diverge throughout the study period (log-rank score = 391, *P* < 0.001).

The relationship between the risk of developing cardiovascular events and hematocrit was further analyzed by stratification of each category of hematocrit into those with or without CKD (Table 2). For subjects with CKD, the previously observed reduction in the risk of developing cardiovascular events with increasing hematocrit was abolished by the presence of CKD. Among those without CKD, there were further reductions in the risk of cardiovascular events with increasing hematocrit compared with those with hematocrit below the normal range (group I). When the association was examined with hematocrit as a continuous variable, hematocrit was not selected as an independent predictor of cardiovascular events for subjects with CKD. In contrast, higher hematocrit was associated with a lower risk of developing cardiovascular events (HR 0.92 [95% CI 0.88–0.96], *P* < 0.001) in the non-CKD cohort.

**CONCLUSIONS** — This study demonstrates that hematocrit is associated with the development of adverse cardiovascular outcomes in Chinese patients with type 2 diabetes. After adjustment for other cardiovascular risk factors, the risk of developing cardiovascular events was highest among subjects with hematocrit below the normal range and decreased with increasing hematocrit. The presence of CKD eliminated the protective effect of

**Table 1—Baseline clinical and biochemical characteristics of 3,983 Chinese type 2 diabetic patients stratified according to their baseline hematocrit values**

|                                             | Group I       | Group II      | Group III     | Group IV       | Group V        |
|---------------------------------------------|---------------|---------------|---------------|----------------|----------------|
| n                                           | 366           | 809           | 1,612         | 904            | 292            |
| Male                                        | 66.4          | 58.5          | 43.9          | 28.0           | 22.6*          |
| Ex- or current smoker                       | 43.8          | 34.2          | 27.6          | 21.2           | 28.6*          |
| Use of ACE inhibitors or ARB treatment      | 17.8          | 16.1          | 12.4          | 9.0            | 8.6*           |
| Age (years)                                 | 66.6 ± 12.2   | 66.2 ± 12.7†  | 58.0 ± 13.2†  | 56.5 ± 13.3†   | 54.8 ± 13.5†   |
| Duration of diabetes (years)                | 10.2 ± 7.2    | 8.7 ± 6.7‡    | 7.1 ± 6.4†    | 6.0 ± 6.0†     | 5.5 ± 5.5†     |
| BMI (kg/m <sup>2</sup> )                    | 23.9 ± 3.5    | 24.7 ± 4.1§   | 25.1 ± 3.9†   | 25.5 ± 4.0†    | 25.2 ± 4.1†    |
| Waist circumference (cm)                    |               |               |               |                |                |
| Male                                        | 86.0 ± 9.4    | 87.9 ± 10.3   | 88.2 ± 9.6§   | 89.5 ± 9.4‡    | 87.7 ± 8.5     |
| Female                                      | 82.4 ± 10.4   | 83.4 ± 10.2   | 83.1 ± 9.8    | 83.9 ± 10.0    | 83.2 ± 9.6     |
| Systolic blood pressure (mmHg)              | 144 ± 24      | 138 ± 22†     | 135 ± 21†     | 135 ± 20†      | 135 ± 20†      |
| Diastolic blood pressure (mmHg)             | 76 ± 13       | 76 ± 11       | 77 ± 11       | 79 ± 11†       | 80 ± 11†       |
| Mean arterial pressure (mmHg)               | 99 ± 15       | 96 ± 13§      | 96 ± 13§      | 98 ± 13        | 99 ± 13        |
| A1C (%)                                     | 7.49 ± 1.80   | 7.63 ± 1.82   | 7.74 ± 1.79   | 7.87 ± 1.84‡   | 8.38 ± 2.10†   |
| Fasting plasma glucose (mmol/l)             | 8.52 ± 6.57   | 8.71 ± 3.77   | 8.78 ± 3.13   | 9.16 ± 3.36§   | 10.00 ± 3.79†  |
| Total cholesterol (mmol/l)                  | 5.03 ± 1.32   | 5.21 ± 1.22†  | 5.41 ± 1.20†  | 5.58 ± 1.08†   | 5.74 ± 1.20†   |
| HDL cholesterol (mmol/l)                    |               |               |               |                |                |
| Male                                        | 1.20 ± 0.38   | 1.18 ± 0.34   | 1.17 ± 0.31   | 1.18 ± 0.32    | 1.13 ± 0.28    |
| Female                                      | 1.25 ± 0.39   | 1.26 ± 0.41   | 1.33 ± 0.36   | 1.34 ± 0.35    | 1.36 ± 0.36    |
| LDL cholesterol (mmol/l)                    | 3.07 ± 1.00   | 3.26 ± 1.05‡  | 3.35 ± 0.91†  | 3.50 ± 0.95†   | 3.62 ± 1.01†   |
| Triglycerides (mmol/l)                      | 1.2 (0.9–1.9) | 1.3 (0.9–2.0) | 1.4 (1.0–2.0) | 1.4 (1.0–2.2)§ | 1.4 (1.0–2.2)§ |
| Serum creatinine (μmol/l)                   |               |               |               |                |                |
| Male                                        | 107 (85–154)  | 89 (78–105)†  | 83 (74–94)†   | 83 (73–92)†    | 83 (72–89)†    |
| Female                                      | 105 (66–213)  | 77 (60–101)†  | 64 (56–76)†   | 62 (56–72)†    | 63 (55–71)†    |
| Mean hematocrit (%)                         |               |               |               |                |                |
| Male                                        | 35.6 ± 3.3    | 41.2 ± 1.1†   | 44.9 ± 1.2†   | 48.1 ± 0.8†    | 51.3 ± 1.3†    |
| Female                                      | 29.2 ± 2.7    | 34.4 ± 1.1†   | 38.1 ± 1.1†   | 41.2 ± 0.9†    | 44.4 ± 1.3†    |
| White blood cell count (10 <sup>9</sup> /l) | 7.0 (6.0–8.7) | 6.9 (5.7–8.2) | 6.8 (5.0–8.0) | 7.2 (6.2–8.5)  | 7.6 (6.4–9.0)  |
| eGFR (ml/min per 1.73 m <sup>2</sup> )      | 62 (36–88)    | 79 (61–97)†   | 91 (75–107)†  | 94 (80–109)†   | 94 (81–110)†   |
| AER (μg/min)                                | 105 (16–1310) | 34 (11–185)†  | 17 (9–72)†    | 16 (8–56)†     | 17 (9–54)†     |
| Micro- and macroalbuminuria                 | 66.9          | 52.9          | 37.2          | 36.2           | 37.1*          |
| Retinopathy                                 | 48.9          | 34.5          | 22.8          | 18.1           | 18.2*          |
| Neuropathy                                  | 56.5          | 40.1          | 29.5          | 25.6           | 21.3*          |
| Macrovascular disease                       | 30.3          | 19.8          | 11.8          | 10.2           | 8.6*           |
| CKD                                         | 48.2          | 24.1          | 9.9           | 6.5            | 5.9*           |

Data are percent, means ± SD, or median (interquartile range). Group I hematocrit values: male <39%, female <32%; group II: male ≥39 to <43%, female ≥32 to <36%; group III: male ≥43 to <47%, female ≥36 to <40%; group IV: male ≥47 to <50%, female ≥40 to <43%; and group V: male ≥50%, female ≥43%. \**P* < 0.001 by  $\chi^2$  test. †*P* < 0.001, ‡*P* < 0.01, §*P* < 0.05 vs. group I.

higher hematocrit on future cardiovascular events. These results indicate that hematocrit and CKD coalesce to modulate the development of cardiovascular outcomes in Chinese patients with type 2 diabetes.

In the present cohort, subjects with hematocrit below the lower limit of the normal range (group I) were less obese, had better glycemic control, and had more favorable lipid profiles compared with those with normal hematocrit. Despite the apparently better metabolic profile, subjects with low hematocrit had higher rates of diabetes complications at baseline and increased risk of developing cardiovascular events at follow-up. The

paradoxical association between conventional cardiovascular risk factors and the presence of diabetes complications are not inconsistent with the concept of reverse epidemiology, a phenomenon that is commonly observed in patients with CKD (14–16). Furthermore, impaired renal function will cause a reduction in the clearance of insulin and oral antidiabetes agents, resulting in improved glycemic control. The lower BMI and cholesterol levels could be related to a degree of malnutrition, which is common among subjects with impaired renal function.

The association between CKD and adverse cardiovascular events is well recognized (3,4,6,8,17). Effective erythro-

poiesis is dependent on the production of erythropoietin by the kidneys. Thus, low hematocrit or anemia could be a proxy for CKD. Furthermore, prolonged use of ACE inhibitors, and to some extent ARBs, has been associated with reduction in hemoglobin (18–20). The higher percentage of ACE inhibitor or ARB treatment in subjects with low hematocrit may therefore confound the association between hematocrit and adverse cardiovascular events. However, hematocrit remained an independent predictor for cardiovascular events after adjustment for CKD, albuminuria, and other conventional risk factors, as well as the use of ACE inhibitors or ARB treatment (Table 2). Taken to-

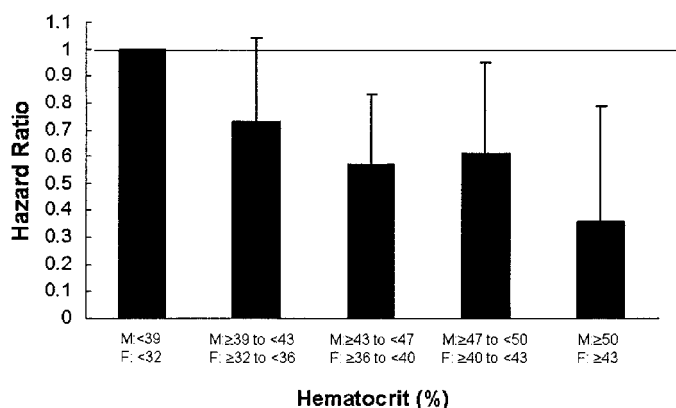

**Figure 1**—Hazard ratios of cardiovascular events according to categories of hematocrit levels in 3,983 Chinese type 2 diabetic patients after a median follow-up period of 3 years using Cox regression analysis. Covariates included age, sex, duration of diabetes, smoking, BMI, mean arterial pressure, HDL cholesterol, LDL cholesterol, triglycerides, A1C, white blood cell count, use of ACE inhibitors or ARB treatment at baseline, prevalent macrovascular diseases, and CKD (defined as eGFR <60 ml/min per 1.73 m<sup>2</sup>). F, female; M, male.

gether, our results indicate that low hematocrit may exert an independent effect on the development of cardiovascular events, at least in Chinese subjects with type 2 diabetes.

Anemia is a common finding in subjects with diabetes. About 20% of ambulatory patients with type 2 diabetes were noted to have anemia (hemoglobin <130 g/l in men and <120 g/l in women) (21). Previous studies have shown that low hematocrit value was a risk factor for cardiovascular disease in the general population, in patients with CKD, and in patients with heart failure (7,8). Anemia is also associated with increased risk of retinopathy in a cross-sectional survey in-

volving diabetic patients in Finland (22). In patients with known CKD, reduced levels of hemoglobin, even within the normal range, identify patients at increased risk for further progression of renal disease including Asian type 2 diabetic patients (23–25). In this connection, anemia has now been shown to be an independent risk factor for cardiovascular events not only in subjects with kidney disease (7) and those with left ventricular dysfunction (8) but also in the general population (9). In a meta-analysis of community-based population studies, anemia interacts with CKD to increase the risk of coronary heart disease, stroke, and all-cause mortality among subjects with dia-

betes (26). In the present study, our results confirm the independent association of hematocrit with cardiovascular events, regardless of the presence of CKD, in subjects with type 2 diabetes.

Several mechanisms may contribute to the association between low hematocrit and adverse clinical outcomes. First, low hematocrit may predispose to chronic myocardial hypoxia, left ventricular dilatation and dysfunction, and lead to increased frequency of cardiovascular disease (17,27–29). Second, anemia is associated with increased oxidative stress since erythrocytes are a major antioxidant component in the blood (30). Third, low-molecular weight advanced glycation end products are associated with declining hemoglobin in type 2 diabetic patients with normal renal function (31). Indeed, correction of anemia in both diabetic and nondiabetic patients with CKD has been shown to reduce hospitalization rate and hospital stay (32,33). Given the high prevalence of anemia and CKD in our diabetic population, there is a need to conduct interventional studies to examine whether optimization of the internal milieu, including correction of anemia, will reduce cardiovascular and renal risk (34).

There are limitations in an observational study. First, the duration of follow-up was relatively short. Nevertheless, the number of cardiovascular events was enough to reveal differences in the predictive power of different categories of hematocrit. Second, there may be selection bias in recruiting patients from a single

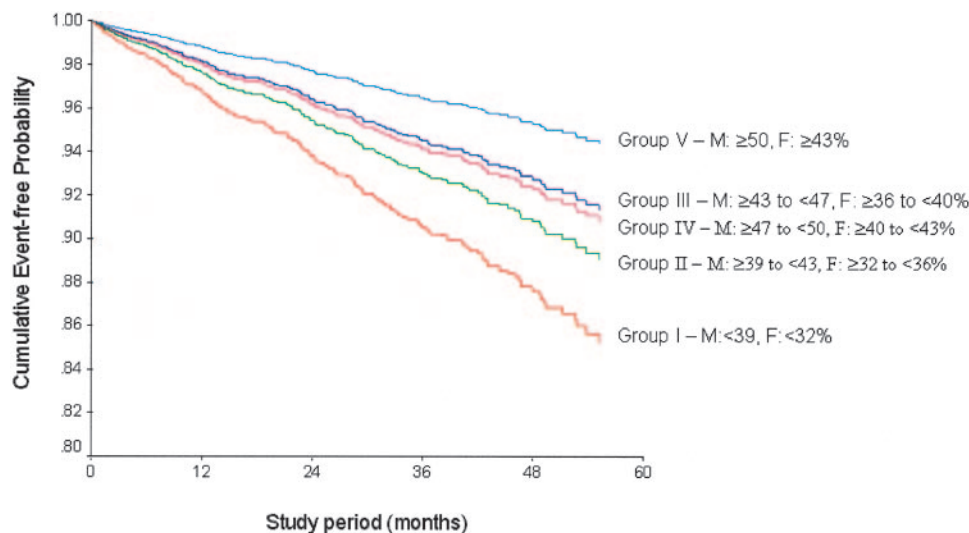

**Figure 2**—Kaplan-Meier curves of cardiovascular events among Chinese type 2 diabetic patients according to categories of hematocrit. Covariates included age, sex, duration of diabetes, smoking, BMI, mean arterial pressure, HDL cholesterol, LDL cholesterol, triglycerides, A1C, white blood cell count, use of ACE inhibitors or ARB treatment at baseline, prevalent macrovascular diseases, and CKD (defined as eGFR <60 ml/min per 1.73 m<sup>2</sup>). F, female; M, male.



**Table 2—Multivariate-adjusted HRs (95% CIs) of cardiovascular events in patients with type 2 diabetes stratified according to hematocrit and CKD defined as eGFR <60 ml/min per 1.73 m<sup>2</sup>**

|             | Group I | Group II         | Group III        | Group IV         | Group V          |
|-------------|---------|------------------|------------------|------------------|------------------|
| With CKD    |         |                  |                  |                  |                  |
| n           | 176     | 195              | 160              | 58               | 17               |
| HR (95% CI) | 1.00    | 1.37 (0.86–2.18) | 0.83 (0.46–1.50) | 0.97 (0.44–2.14) | 0.99 (0.29–3.33) |
| P value     | Ref.    | 0.187            | 0.538            | 0.943            | 0.985            |
| Without CKD |         |                  |                  |                  |                  |
| n           | 189     | 613              | 1,450            | 841              | 272              |
| HR (95% CI) | 1.00    | 0.37 (0.22–0.63) | 0.37 (0.23–0.60) | 0.39 (0.23–0.69) | 0.20 (0.07–0.53) |
| P value     | Ref.    | <0.001           | <0.001           | 0.001            | 0.001            |

Group I hematocrit values: male <39%, female <32%; group II: male ≥39 to <43%, female ≥32 to <36%; group III: male ≥43 to <47%, female ≥36 to <40%; group IV: male ≥47 to <50%, female ≥40 to <43%; and group V: male ≥50%, female ≥43%. Covariates included age, sex, duration of diabetes, smoking, BMI, mean arterial pressure, HDL cholesterol, LDL cholesterol, triglycerides, A1C, white blood cell count, use of ACE inhibitors or ARB treatment at baseline, and prevalent macrovascular diseases.

center. In Hong Kong, most patients with chronic diseases including diabetes are managed at public hospitals. Hence, the present cohort is a representative sample of Chinese patients with diabetes in Hong Kong. Lastly, all covariates were measured once at baseline. The variability of measurements may lead to underestimation of the confounding effect of covariates on outcomes. Nonetheless, our results demonstrated the benefit of having these measurements on a single occasion in identifying high-risk subjects in clinical practice.

In conclusion, low levels of hematocrit and the presence of CKD are associated with increased risk of developing adverse cardiovascular events. While these findings call for routine monitoring of hematocrit in subjects with type 2 diabetes to identify high-risk subjects for cardiovascular complications, interventional studies are required to confirm the causal nature of these associations.

**Acknowledgments**—This study was supported in part by the Li Ka Shing Institute of Health Sciences.

We thank our medical and nursing staff at the Diabetes and Endocrine Centre, Prince of Wales Hospital (PWH), for their dedication. We thank Dr. Fung Hong and Edwina Chu for extracting relevant data from the Hong Kong Hospital Authority Database and Kevin H.M. Yu for managing the PWH Diabetes Registry.

P.C.Y.T. had full access to all the data in the study and takes responsibility for the integrity of the data and the accuracy of the data analysis.

## References

- King H, Aubert RE, Herman WH: Global burden of diabetes, 1995–2025: prevalence, numerical estimates, and projections. *Diabetes Care* 21:1414–1431, 1998
- Gu D, Reynolds K, Duan X, Xin X, Chen J, Wu X, Mo J, Whelton PK, He J: Prevalence of diabetes and impaired fasting glucose in the Chinese adult population: International Collaborative Study of Cardiovascular Disease in Asia (InterASIA). *Diabetologia* 46:1190–1198, 2003
- Anavekar NS, McMurray JJ, Velazquez EJ, Solomon SD, Kober L, Rouleau JL, White HD, Nordlander R, Maggioni A, Dickstein K, Zelenkofske S, Leimberger JD, Califf RM, Pfeffer MA: Relation between renal dysfunction and cardiovascular outcomes after myocardial infarction. *N Engl J Med* 351:1285–1295, 2004
- Go AS, Chertow GM, Fan D, McCulloch CE, Hsu CY: Chronic kidney disease and the risks of death, cardiovascular events, and hospitalization. *N Engl J Med* 351:1296–1305, 2004
- Pecoits-Filho R, Lindholm B, Stenvinkel P: The malnutrition, inflammation, and atherosclerosis (MIA) syndrome: the heart of the matter. *Nephrol Dial Transplant* 17:28–31, 2002
- Sarnak MJ, Levey AS, Schoolwerth AC, Coresh J, Culeton B, Hamm LL, McCullough PA, Kasiske BL, Kelepouris E, Klag MJ, Parfrey P, Pfeffer M, Raij L, Spinosa DJ, Wilson PW: Kidney disease as a risk factor for development of cardiovascular disease: a statement from the American Heart Association Councils on Kidney in Cardiovascular Disease, High Blood Pressure Research, Clinical Cardiology, and Epidemiology and Prevention. *Circulation* 108:2154–2169, 2003
- Foley RN, Parfrey PS, Harnett JD, Kent GM, Murray DC, Barre PE: The impact of anemia on cardiomyopathy, morbidity, and mortality in end-stage renal disease. *Am J Kidney Dis* 28:53–61, 1996
- Al-Ahmad A, Rand WM, Manjunath G, Konstam MA, Salem DN, Levey AS, Sarnak MJ: Reduced kidney function and anemia as risk factors for mortality in patients with left ventricular dysfunction. *J Am Coll Cardiol* 38:955–962, 2001
- Sarnak MJ, Tighiouart H, Manjunath G, MacLeod B, Griffith J, Salem D, Levey AS: Anemia as a risk factor for cardiovascular disease in the Atherosclerosis Risk in Communities (ARIC) study. *J Am Coll Cardiol* 40:27–33, 2002
- Piwnetz K, Home PD, Snorgaard O, Antsiferov M, Staehr-Johansen K, Krans M: Monitoring the targets of the St Vincent Declaration and the implementation of quality management in diabetes care: the DIABCARE initiative: the DIABCARE Monitoring Group of the St Vincent Declaration Steering Committee. *Diabet Med* 10:371–377, 1993
- Tong PC, Lee KF, So WY, Ng MH, Chan WB, Lo MK, Chan NN, Chan JC: White blood cell count is associated with macro- and microvascular complications in Chinese patients with type 2 diabetes. *Diabetes Care* 27:216–222, 2004
- Levey AS, Greene T, Kusek JW, Beck GJ: A simplified equation to predict glomerular filtration rate from serum creatinine (Abstract). *J Am Soc Nephrol* 11:A0828, 2000
- National Kidney Foundation: K/DOQI clinical practice guidelines for chronic kidney disease: evaluation, classification, and stratification. *Am J Kidney Dis* 39 (Suppl. 1):S1–S266, 2002
- Curtis JP, Selter JG, Wang Y, Rathore SS, Jovin IS, Jadbabaie F, Kosiborod M, Portnay EL, Sokol SI, Bader F, Krumholz HM: The obesity paradox: body mass index and outcomes in patients with heart failure. *Arch Intern Med* 165:55–61, 2005
- Kalantar-Zadeh K, Kilpatrick RD, McAllister CJ, Greenland S, Kopple JD: Reverse epidemiology of hypertension and cardiovascular death in the hemodialysis population: the 58th annual fall conference and scientific sessions. *Hypertension* 45:811–817, 2005
- Qureshi AR, Alvestrand A, Divino-Filho JC, Gutierrez A, Heimbürger O, Lindholm B, Bergstrom J: Inflammation, malnutrition, and cardiac disease as predictors of

- mortality in hemodialysis patients. *J Am Soc Nephrol* 13 (Suppl. 1):S28–S36, 2002
17. Abramson JL, Jurkovic CT, Vaccarino V, Weintraub WS, McClellan W: Chronic kidney disease, anemia, and incident stroke in a middle-aged, community-based population: the ARIC study. *Kidney Int* 64:610–615, 2003
18. Albitar S, Genin R, Fen-Chong M, Serveaux MO, Bourgeon B: High dose enalapril impairs the response to erythropoietin treatment in haemodialysis patients. *Nephrol Dial Transplant* 13:1206–1210, 1998
19. Ishani A, Weinhandl E, Zhao Z, Gilbertson DT, Collins AJ, Yusuf S, Herzog CA: Angiotensin-converting enzyme inhibitor as a risk factor for the development of anemia, and the impact of incident anemia on mortality in patients with left ventricular dysfunction. *J Am Coll Cardiol* 45:391–399, 2005
20. Macdougall IC: ACE inhibitors and erythropoietin responsiveness. *Am J Kidney Dis* 38:649–651, 2001
21. Thomas MC, MacIsaac RJ, Tsalamandris C, Molyneux L, Goubina I, Fulcher G, Yue D, Jerums G: The burden of anaemia in type 2 diabetes and the role of nephropathy: a cross-sectional audit. *Nephrol Dial Transplant* 19:1792–1797, 2004
22. Qiao Q, Keinänen-Kiukaanniemi S, Laara E: The relationship between hemoglobin levels and diabetic retinopathy. *J Clin Epidemiol* 50:153–158, 1997
23. Chan JC, Wat NM, So WY, Lam KS, Chua CT, Wong KS, Morad Z, Dickson TZ, Hille D, Zhang Z, Cooper ME, Shahinfar S, Brenner BM, Kurokawa K: Renin angiotensin aldosterone system blockade and renal disease in patients with type 2 diabetes: an Asian perspective from the RENAAL study. *Diabetes Care* 27:874–879, 2004
24. Keane WF, Brenner BM, de Zeeuw D, Grunfeld JP, McGill J, Mitch WE, Ribeiro AB, Shahinfar S, Simpson RL, Snapinn SM, Toto R: The risk of developing end-stage renal disease in patients with type 2 diabetes and nephropathy: the RENAAL study. *Kidney Int* 63:1499–1507, 2003
25. McClellan WM, Flanders WD, Langston RD, Jurkovic C, Presley R: Anemia and renal insufficiency are independent risk factors for death among patients with congestive heart failure admitted to community hospitals: a population-based study. *J Am Soc Nephrol* 13:1928–1936, 2002
26. Vlagopoulos PT, Tighiouart H, Weiner DE, Griffith J, Pettitt D, Salem DN, Levey AS, Sarnak MJ: Anemia as a risk factor for cardiovascular disease and all-cause mortality in diabetes: the impact of chronic kidney disease. *J Am Soc Nephrol* 16:3403–3410, 2005
27. Amin MG, Tighiouart H, Weiner DE, Stark PC, Griffith JL, MacLeod B, Salem DN, Sarnak MJ: Hematocrit and left ventricular mass: the Framingham Heart Study. *J Am Coll Cardiol* 43:1276–1282, 2004
28. Dahlöf B, Devereux RB, Kjeldsen SE, Julius S, Beevers G, de Faire U, Fyhrquist F, Ibsen H, Kristiansson K, Lederballe-Pedersen O, Lindholm LH, Nieminen MS, Omvik P, Oparil S, Wedel H: Cardiovascular morbidity and mortality in the Losartan Intervention For Endpoint reduction in hypertension study (LIFE): a randomised trial against atenolol. *Lancet* 359:995–1003, 2002
29. Levin A, Thompson CR, Ethier J, Carlisle EJ, Tobe S, Mendelssohn D, Burgess E, Jindal K, Barrett B, Singer J, Djurdjev O: Left ventricular mass index increase in early renal disease: impact of decline in hemoglobin. *Am J Kidney Dis* 34:125–134, 1999
30. Grune T, Sommerburg O, Siems WG: Oxidative stress in anemia. *Clin Nephrol* 53 (Suppl. 1):S18–S22, 2000
31. Thomas MC, Tsalamandris C, MacIsaac R, Medley T, Kingwell B, Cooper ME, Jerums G: Low-molecular-weight AGEs are associated with GFR and anemia in patients with type 2 diabetes. *Kidney Int* 66:1167–1172, 2004
32. Khan SS, Kazmi WH, Abichandani R, Tighiouart H, Pereira BJ, Kausz AT: Health care utilization among patients with chronic kidney disease. *Kidney Int* 62:229–236, 2002
33. Silverberg DS, Wexler D, Blum M, Tchebner JZ, Sheps D, Keren G, Schwartz D, Baruch R, Yachnin T, Shaked M, Schwartz I, Steinbruch S, Iaina A: The effect of correction of anaemia in diabetics and non-diabetics with severe resistant congestive heart failure and chronic renal failure by subcutaneous erythropoietin and intravenous iron. *Nephrol Dial Transplant* 18:141–146, 2003
34. Thomas MC, Cooper ME, Rossing K, Parving HH: Anaemia in diabetes: is there a rationale to TREAT? *Diabetologia* 49:1151–1157, 2006
